# Supplementary material for: High-Performance Semiconducting Carbon Nanotube Transistors Using Naphthalene Diimide-Based Polymers with Biaxially Extended Conjugated Side Chains
Source: PubMed Central journal article supplement (PMC11367582; doi:10.1021/acsami.4c08981), 2024-08-13
Supplement: am4c08981_si_001.pdf [file am4c08981_si_001.pdf]

# Supporting Information

## **High-Performance Semiconducting Carbon Nanotube Transistors Using Naphthalene Diimide-based Polymers with Biaxially Extended Conjugated Side Chains**

*Chun-Chi Chen,<sup>a</sup> Shang-Wen Su,<sup>a</sup> Yi-Hsuan Tung,<sup>a</sup> Po-Yuan Wang,<sup>a</sup> Sheng-Sheng Yu,<sup>a</sup> Chi-Cheng Chiu,<sup>a</sup> Chien-Chung Shih<sup>c,\*</sup> and Yan-Cheng Lin,<sup>a,b,\*</sup>*

<sup>a</sup> Department of Chemical Engineering, National Cheng Kung University, Tainan 70101, Taiwan

<sup>b</sup> Advanced Research Center for Green Materials Science and Technology, National Taiwan University, Taipei 10617, Taiwan

<sup>c</sup> Department of Chemical Engineering and Materials Engineering, National Yunlin University of Science and Technology, Yunlin 64002, Taiwan

\*Corresponding author. E-mail:

shihcc@yuntech.edu.tw (C.-C. Shih); ycl@gs.ncku.edu.tw (Y.-C. Lin);

**Table S1.** Optical, electrochemical, and thermal properties of the polymers.

| CPs       | $\lambda_{\max}$ (nm) <sup>a</sup> | HOMO (eV) <sup>b</sup> | LUMO (eV) <sup>b</sup> | $E_g^{\text{CV}}$ (eV) <sup>c</sup> | $E_g^{\text{UV}}$ (eV) <sup>d</sup> | $T_d$ (°C) <sup>e</sup> |
|-----------|------------------------------------|------------------------|------------------------|-------------------------------------|-------------------------------------|-------------------------|
| <b>P1</b> | 389, 705                           | -5.96                  | -4.09                  | 1.87                                | 1.76                                | 436                     |
| <b>P2</b> | 369, 637                           | -5.91                  | -3.77                  | 2.14                                | 1.95                                | 312                     |
| <b>P3</b> | 375, 635                           | -5.89                  | -3.73                  | 2.16                                | 1.95                                | 358                     |

<sup>a</sup> UV-Vis absorption maximum position of the CPs dissolved in toluene. <sup>b</sup> Derived from the CV oxidative onset potential determined using Fc/Fc<sup>+</sup> as an internal potential reference. <sup>c</sup> HOMO and LUMO gap determined from the difference between the oxidative and reductive onsets in CV profiles. <sup>d</sup> Energy bandgap determined from the onset wavelength in UV-Vis spectrum. <sup>e</sup> Determined from TGA at 5% weight loss in a nitrogen atmosphere.

**Table S2.** FET dielectric layer parameters.

| Layer                  | Thickness (nm) | Dielectric constant ( $\epsilon_r$ ) |
|------------------------|----------------|--------------------------------------|
| <b>SiO<sub>2</sub></b> | 300            | 3.9                                  |
| <b>SBS</b>             | 30             | 2.4                                  |

**Table S3.** Summary of the sorting parameters of CP/*sc*-SWNT solutions and the crystallographic parameters of the pristine CP films.

| CPs       | $C_{sc\text{-SWNTs}}$ (g L <sup>-1</sup> ) <sup>a</sup> | $\phi$ <sup>a</sup> | Purity (%) | Yield (%) | $d_{100}$ (Å) <sup>b</sup> | $q_{100}$ (Å <sup>-1</sup> ) <sup>b</sup> |
|-----------|---------------------------------------------------------|---------------------|------------|-----------|----------------------------|-------------------------------------------|
| <b>P1</b> | 0.044                                                   | 0.325               | ~99        | 34.0      | 25.1                       | 0.25                                      |
| <b>P2</b> | 0.003                                                   | 0.429               | >99        | 2.3       | 31.9                       | 0.20                                      |
| <b>P3</b> | 0.032                                                   | 0.586               | >99        | 23.3      | 34.3                       | 0.18                                      |

<sup>a</sup> *sc*-SWNT concentration of the as-sorted solutions and  $\phi$  value determined from the UV-Vis absorption spectra in **Figure S19**. <sup>b</sup>  $d$ -spacing and  $q$  values are extracted from the 1D GIXD profiles.

**Table S4.** Crystallographic parameters of the CP/*sc*-SWNT films, including the *d*-spacing, full-width at half-maximum (FWHM), and paracrystalline disorder of the IP(010) diffraction peaks.

| CPs/ <i>sc</i> -SWNTs | $d_{010}$ (Å) | $q_{010}$ (Å <sup>-1</sup> ) | FWHM  | $g_{010}$ (%) |
|-----------------------|---------------|------------------------------|-------|---------------|
| P1                    | 4.65          | 1.352                        | 0.245 | 16.9          |
| P2                    | 4.61          | 1.362                        | 0.262 | 17.5          |
| P3                    | 4.59          | 1.369                        | 0.267 | 17.6          |

**Table S5.** Device performances of FETs comprising the CP/*sc*-SWNTs.

| CPs/ <i>sc</i> -SWNTs   | $\mu_h$ (cm <sup>2</sup> V <sup>-1</sup> s <sup>-1</sup> ) <sup>a</sup> | $V_{th}$ (V) <sup>b</sup> | $I_{on}/I_{off}$ <sup>c</sup> | $S_s$ (V/dec) <sup>d</sup> | $N_{tr}$ ( $\times 10^{12}$ cm <sup>-1</sup> eV <sup>-1</sup> ) <sup>e</sup> |
|-------------------------|-------------------------------------------------------------------------|---------------------------|-------------------------------|----------------------------|------------------------------------------------------------------------------|
| P1<br>( $V_d = -1$ V)   | 0.058                                                                   | 3.8                       | 10 <sup>5</sup>               | 5.8                        | 5.27                                                                         |
| P3<br>( $V_d = -1$ V)   | 0.079                                                                   | 11.1                      | 10 <sup>5</sup>               | 4.6                        | 4.18                                                                         |
| P1<br>( $V_d = -10$ V)  | 0.48                                                                    | 4.4                       | 10 <sup>5</sup>               | 6.3                        | 5.73                                                                         |
| P3<br>( $V_d = -10$ V)  | 0.99                                                                    | 11.6                      | 10 <sup>6</sup>               | 5.6                        | 5.09                                                                         |
| P1<br>( $V_d = -100$ V) | 2.21                                                                    | 13.7                      | 10 <sup>5</sup>               | 15.2                       | 13.8                                                                         |
| P3<br>( $V_d = -100$ V) | 4.72                                                                    | 24.5                      | 10 <sup>3</sup>               | 12.6                       | 11.5                                                                         |

<sup>a</sup> Average hole mobility of the P-type FET device measured at  $V_d = -10$  or  $-100$  V. <sup>b</sup> Threshold voltage.

<sup>c</sup> On-off current ratio. <sup>d</sup> Subthreshold swing. <sup>e</sup> Maximum interfacial trap density calculated from the subthreshold slope.

**Table S6.** Device performances of FETs comprising the CP thin films as the channel.

| CPs | $\mu_e$ (cm <sup>2</sup> V <sup>-1</sup> s <sup>-1</sup> ) <sup>a</sup> | $V_{th}$ (V) <sup>b</sup> | $I_{on}/I_{off}$ <sup>c</sup> |
|-----|-------------------------------------------------------------------------|---------------------------|-------------------------------|
| P1  | $3.5 \times 10^{-2}$                                                    | 37.0                      | 10 <sup>3</sup>               |
| P2  | $1.8 \times 10^{-3}$                                                    | 14.4                      | 10 <sup>5</sup>               |
| P3  | $3.4 \times 10^{-5}$                                                    | 27.7                      | 10 <sup>3</sup>               |

<sup>a</sup> Average electron mobility of the N-type FET device measured at  $V_d = 100$  V. <sup>b</sup> Threshold voltage.

<sup>c</sup> On-off current ratio.

## Materials Characterizations.

$^1\text{H}$  and  $^{13}\text{C}$  nuclear magnetic resonance (NMR) spectra were recorded on a Bruker AVNEO500 with working frequencies of 500 MHz for  $^1\text{H}$  and 125 MHz for  $^{13}\text{C}$ , respectively, and with *d*-chloroform ( $\text{CDCl}_3$ ) and dimethyl sulfoxide-*d*<sub>6</sub> ( $\text{DMSO-}d_6$ ) as the *d*-solvent. Number-average molecular weights ( $M_n$ ), weight-average molecular weights ( $M_w$ ), and PDI of polymers were measured at 40 °C and flowing rate of 0.3 mL min<sup>-1</sup> in tetrahydrofuran (THF) by gel permeation chromatography (GPC) on a LC-20AT (Shodex GPC LF-604). Thermogravimetry analysis (TGA) measurement was performed from 100 to 750 °C with a heating rate of 10 °C min<sup>-1</sup> on a Perkin Elmer TGA4000. Differential scanning calorimetry (DSC) was measured under N<sub>2</sub> protection from 30 to 300 °C with a heating rate of 10 °C min<sup>-1</sup> on a Perkin Elmer DSC6000. The elemental analysis of reported polymers was performed on a UNICUBE (Elementar, Germany). Cyclic voltammetry (CV) analysis was conducted by a CHI 6273E electrochemical analyzer (CH Instrument Inc.), and ITO glass, Pt wire, and Ag/AgNO<sub>3</sub> (acetonitrile (*sat.*)) were served in a three-electrode cell system as the working, auxiliary, and reference electrodes, respectively.

### Physical properties of the synthesized CPs:

**P1:**  $^1\text{H}$  NMR (500 MHz,  $\text{CDCl}_3$ ,  $\delta$  ppm, 25 °C, **Figure S10**): 8.67 (d,  $J = 155$  Hz, 2H), 7.48–7.07 (br, 4H), 4.11 (s, 4H), 1.98 (s, 2H) 1.51–0.78 (br, 76H).  $M_n$  (GPC) = 66000, PDI = 1.69. Yield = 78% (550 mg).

**P2:**  $^1\text{H}$  NMR (500 MHz,  $\text{CDCl}_3$ ,  $\delta$  ppm, 25 °C, **Figure S12**): 8.89 (s, 2H), 8.22 (d,  $J = 5$  Hz, 4H), 7.41 (d,  $J = 6$  Hz, 4H), 7.32 (s, 2H), 7.22 (s, 2H) 4.20 (d,  $J = 5.5$  Hz, 4H), 1.58 (s, 2H), 1.44–0.79 (br, 76H).  $M_n$  (GPC) = 5,200, PDI = 1.23 (bimodal molecular weight distribution due to the polymer aggregates). Anal. Calcd for  $\text{C}_{76}\text{H}_{98}\text{N}_2\text{O}_8\text{S}_2$  (%): C, 74.1; H, 8.9; N, 2.3; S, 5.2. Found (%): C, 67.2; H, 7.4; N, 2.14; S, 3.6. Yield = 55% (100 mg).

**P3:**  $^1\text{H}$  NMR (500 MHz,  $\text{CDCl}_3$ ,  $\delta$  ppm, 25 °C, **Figure S14**): 8.91 (s, 2H), 8.76 (s, 2H), 7.18 (s, 4H), 7.38–7.29 (br, 2H), 7.24–7.16 (br, 2H) 4.26 (s, 4H), 1.57 (s, 2H), 1.42–0.75 (br, 154H).  $M_n$  (GPC) = 5,950, PDI = 1.4 (bimodal molecular weight distribution due to the polymer aggregates). Anal. Calcd for  $\text{C}_{118}\text{H}_{178}\text{N}_2\text{O}_{12}\text{S}_2$  (%): C, 75.4; H, 9.5; N, 1.5; S, 3.4. Found (%): C, 80.0; H, 11.1; N, 0.7; S, 1.4. Yield = 67% (130 mg).

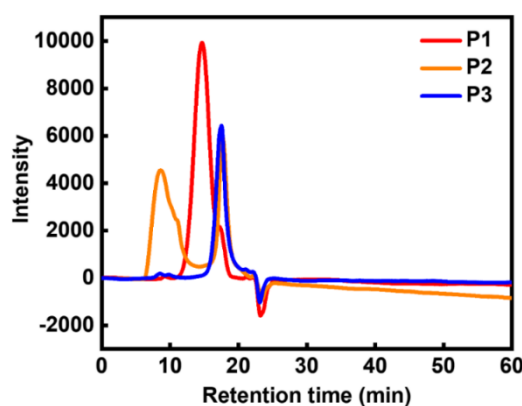

**Figure S1.** GPC profiles of the CPs in THF at 40 °C and  $0.3 \text{ mL min}^{-1}$ . Note that the molecular weight used poly(methyl methacrylate) (PMMA) as the molecular weight standard.

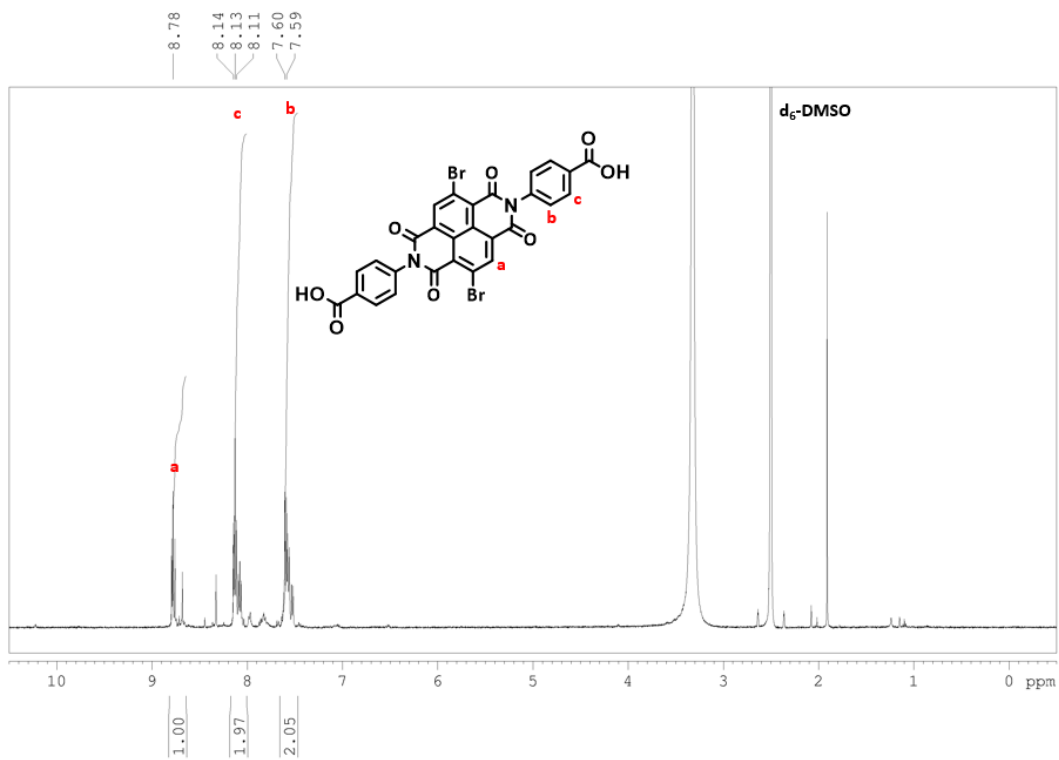

**Figure S2.**  $^1\text{H}$  NMR spectrum of M1 in  $\text{DMSO-}d_6$ .

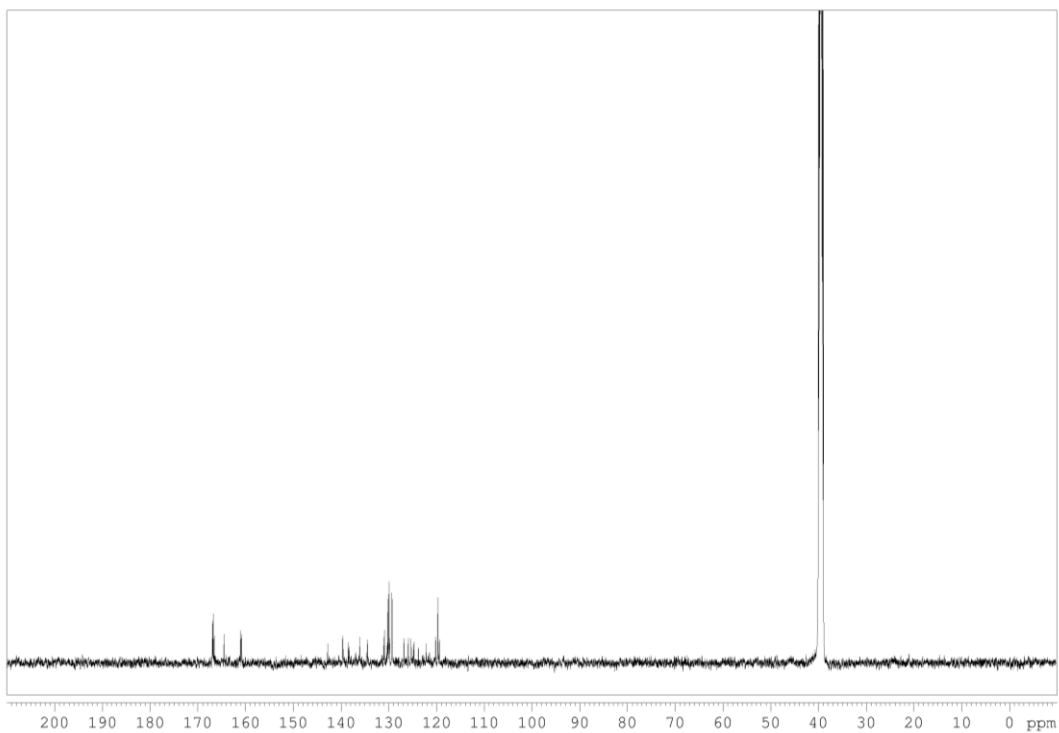

**Figure S3.**  $^{13}\text{C}$  NMR spectrum of M1 in  $\text{DMSO-}d_6$ .

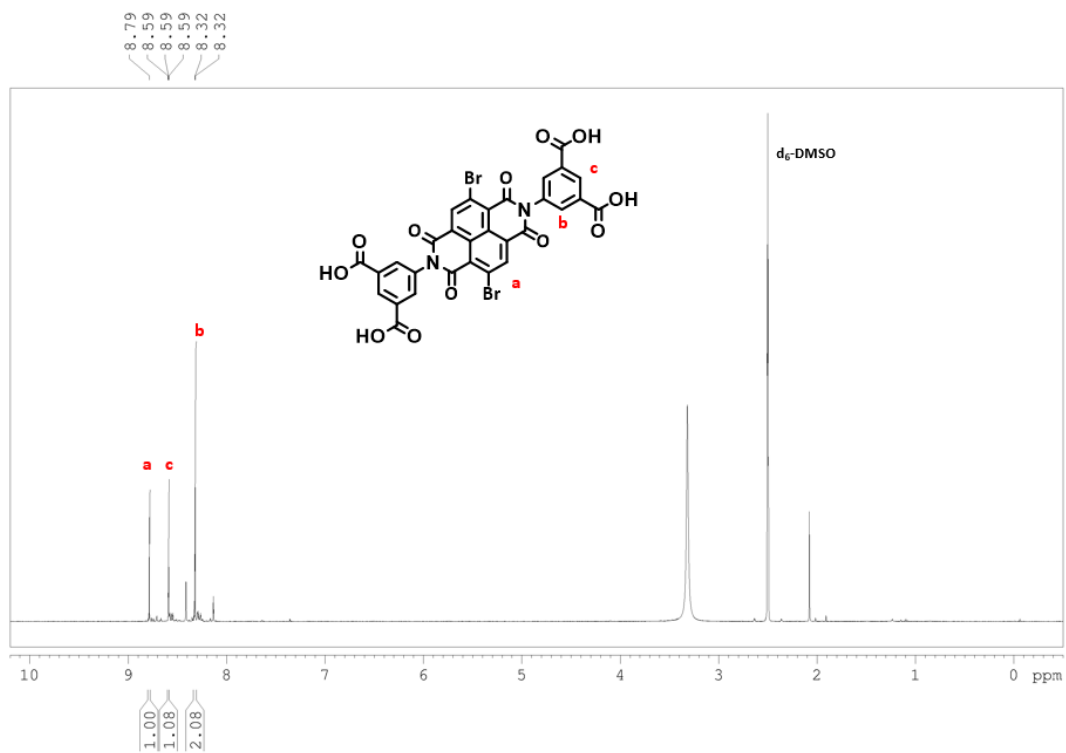

**Figure S4.**  $^1\text{H}$  NMR spectrum of M2 in  $\text{DMSO-}d_6$ .

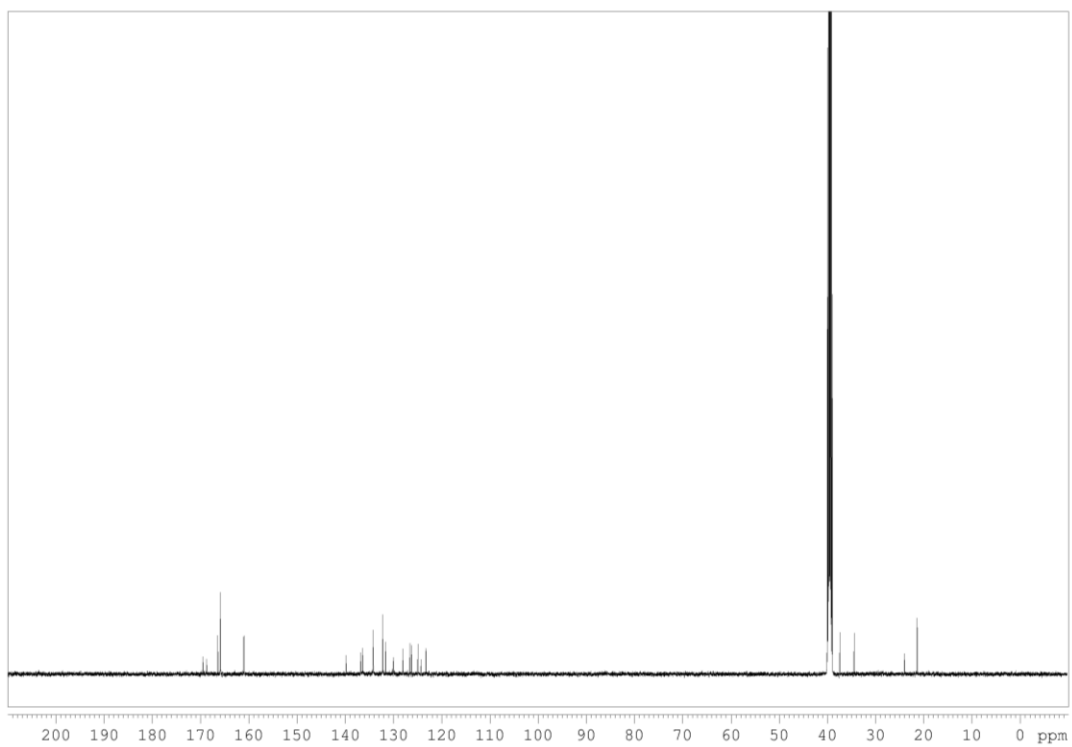

**Figure S5.**  $^{13}\text{C}$  NMR spectrum of M2 in  $\text{DMSO-}d_6$ .

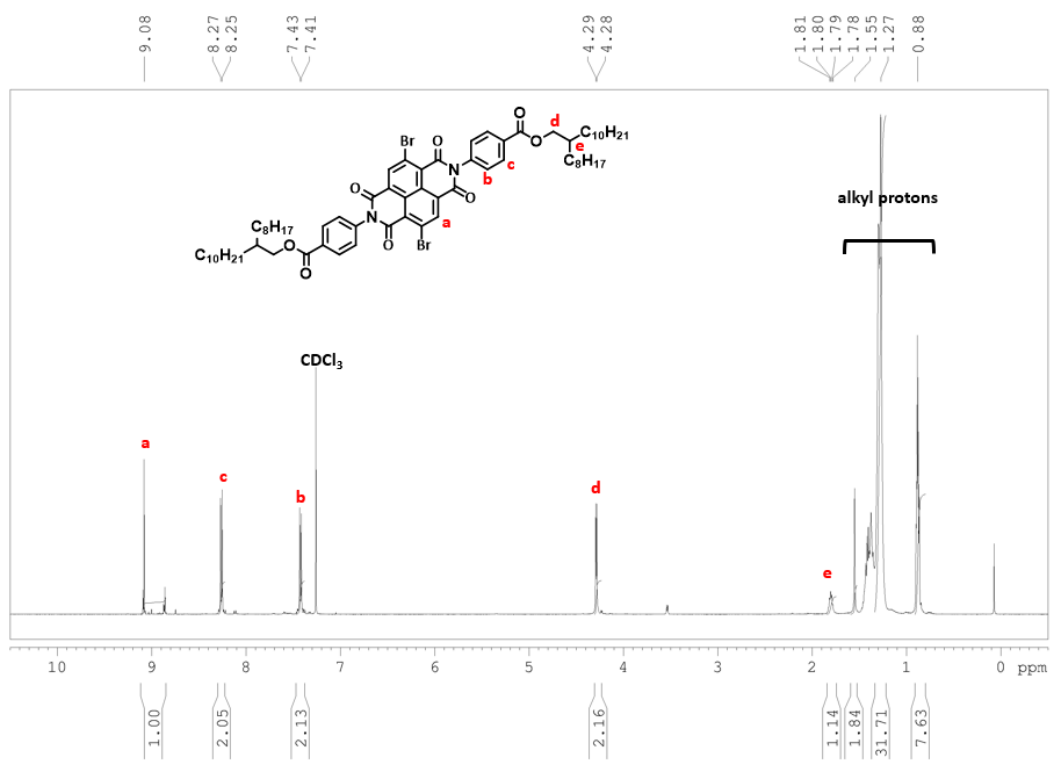

**Figure S6.**  $^1\text{H}$  NMR spectrum of **M3** in  $\text{CDCl}_3$ .

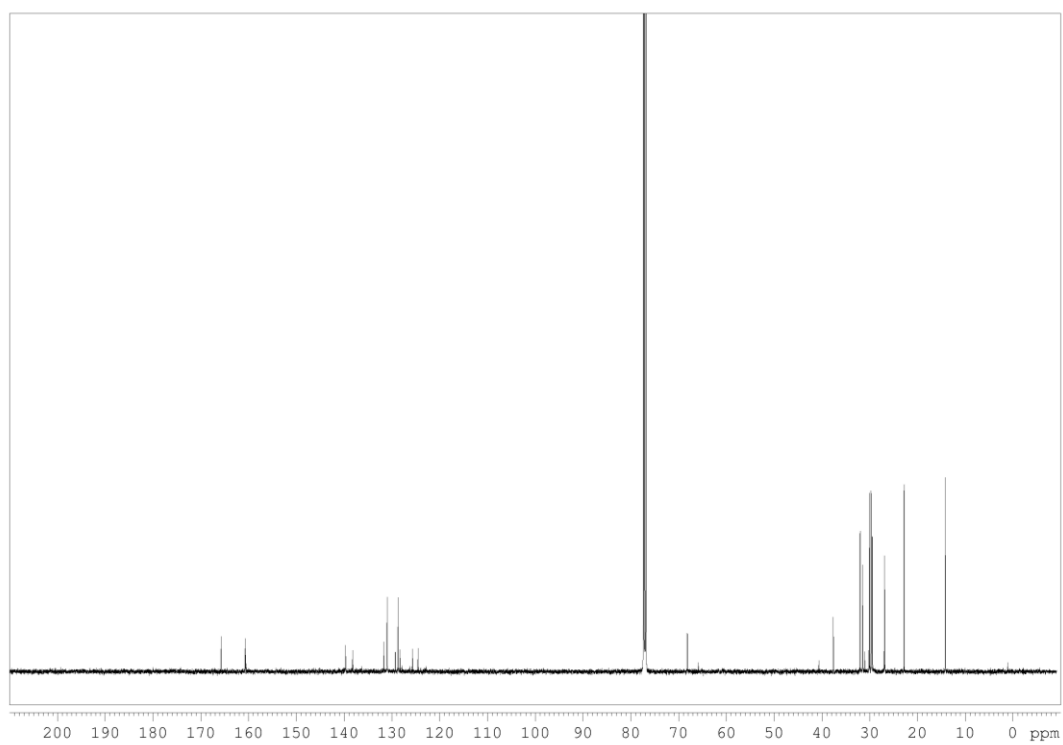

**Figure S7.**  $^{13}\text{C}$  NMR spectrum of **M3** in  $\text{CDCl}_3$ .



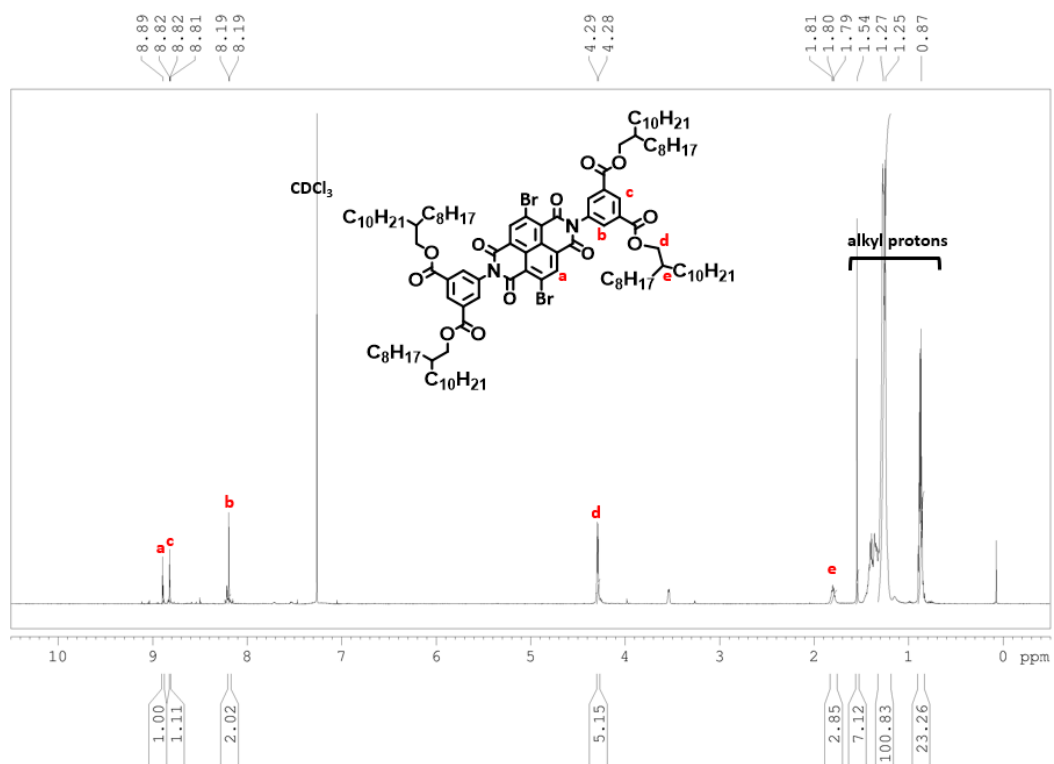

**Figure S8.**  $^1\text{H}$  NMR spectrum of M4 in  $\text{CDCl}_3$ .

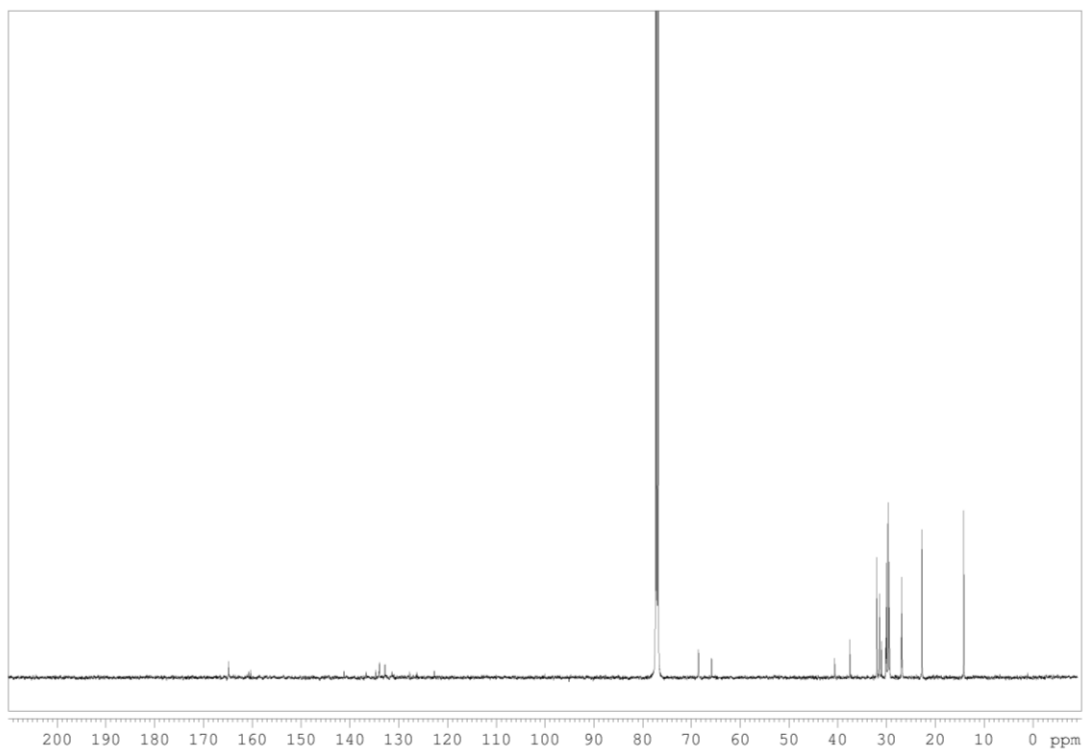

**Figure S9.**  $^{13}\text{C}$  NMR spectrum of M4 in  $\text{CDCl}_3$ .

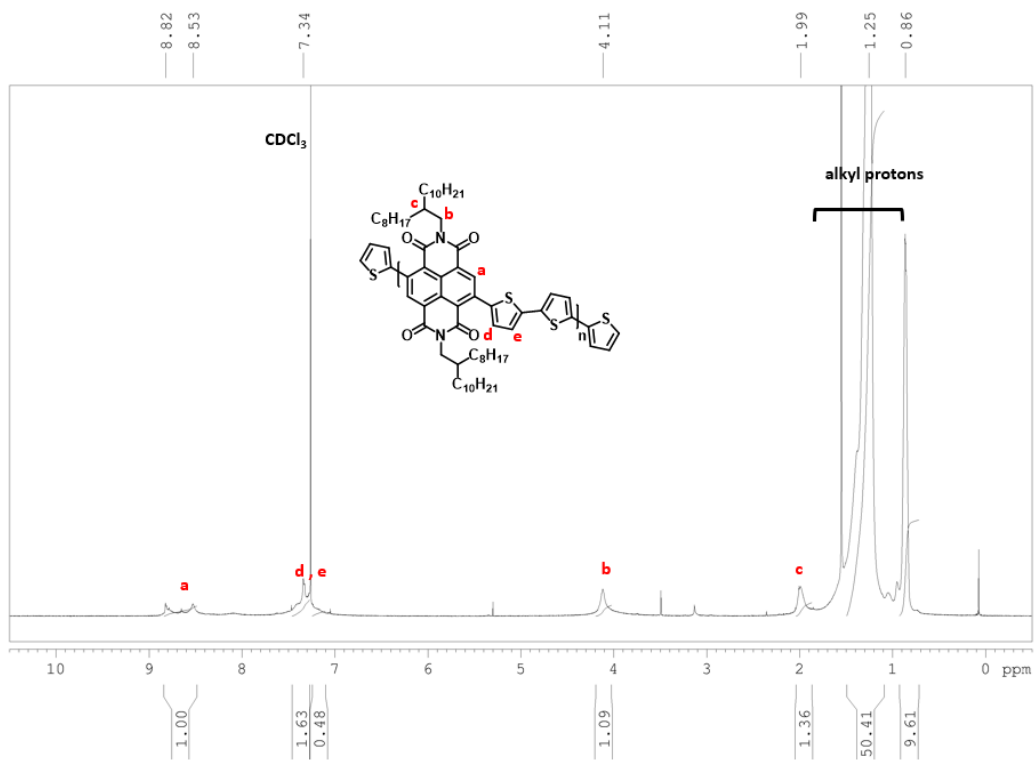

Figure S10. <sup>1</sup>H NMR spectrum of P1 in CDCl<sub>3</sub>.

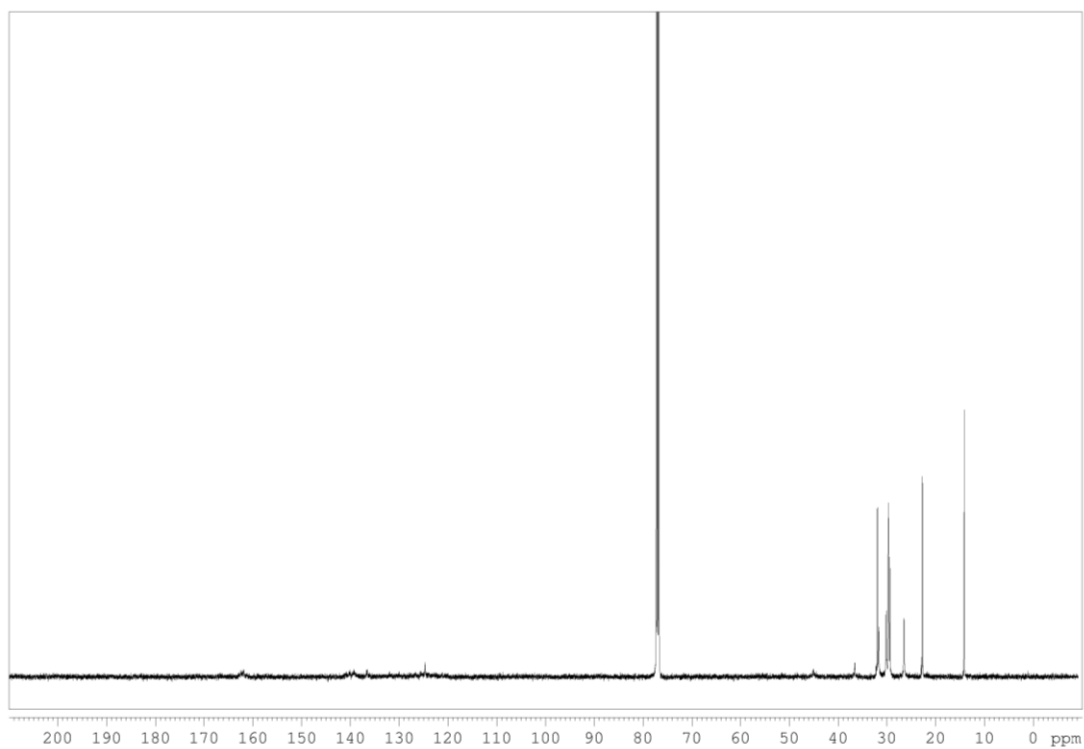

Figure S11. <sup>13</sup>C NMR spectrum of P1 in CDCl<sub>3</sub>.

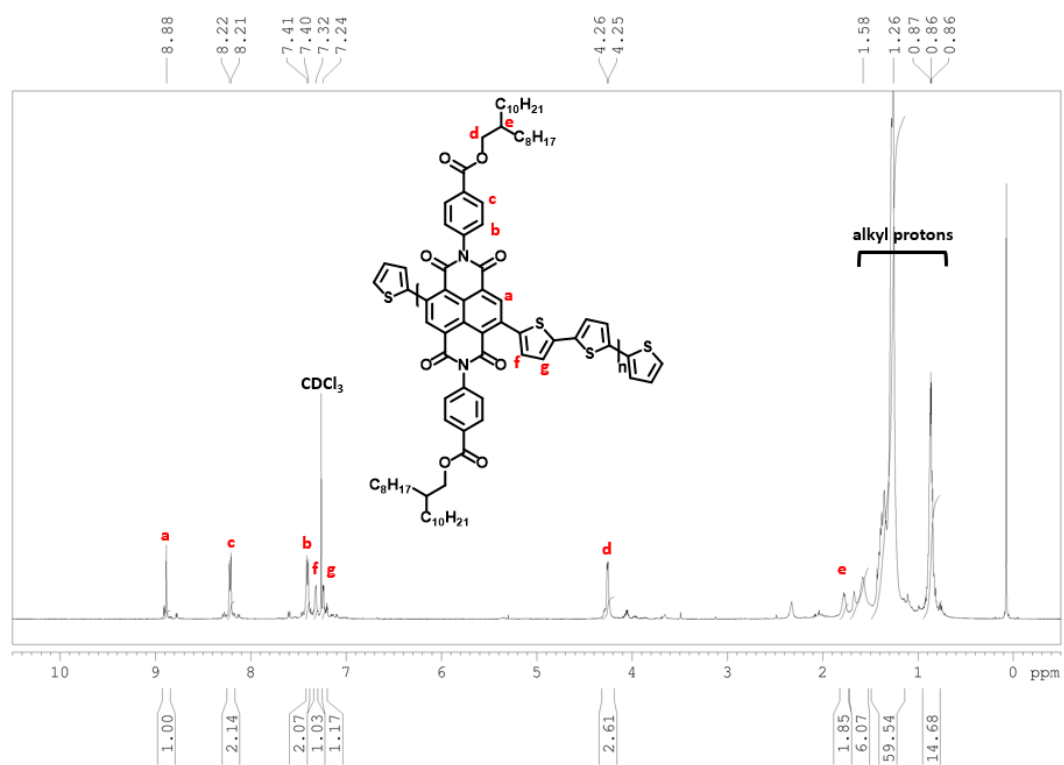

**Figure S12.**  $^1\text{H}$  NMR spectrum of **P2** in  $\text{CDCl}_3$ .

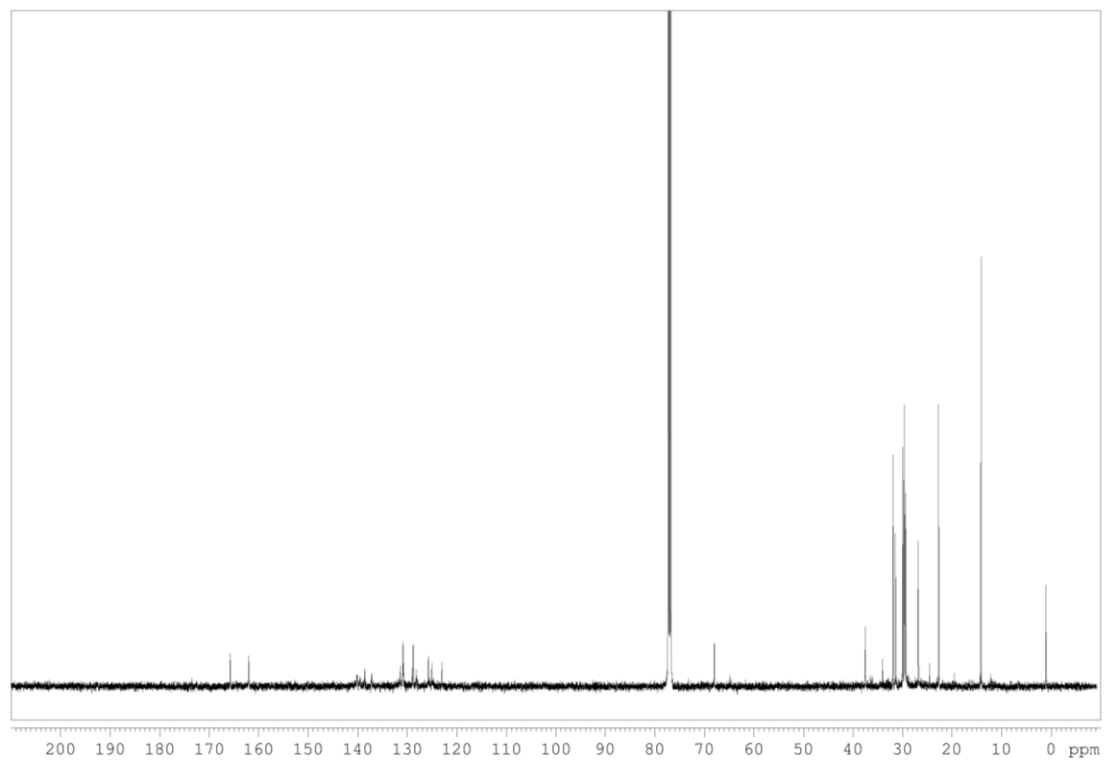

**Figure S13.**  $^{13}\text{C}$  NMR spectrum of **P2** in  $\text{CDCl}_3$ .

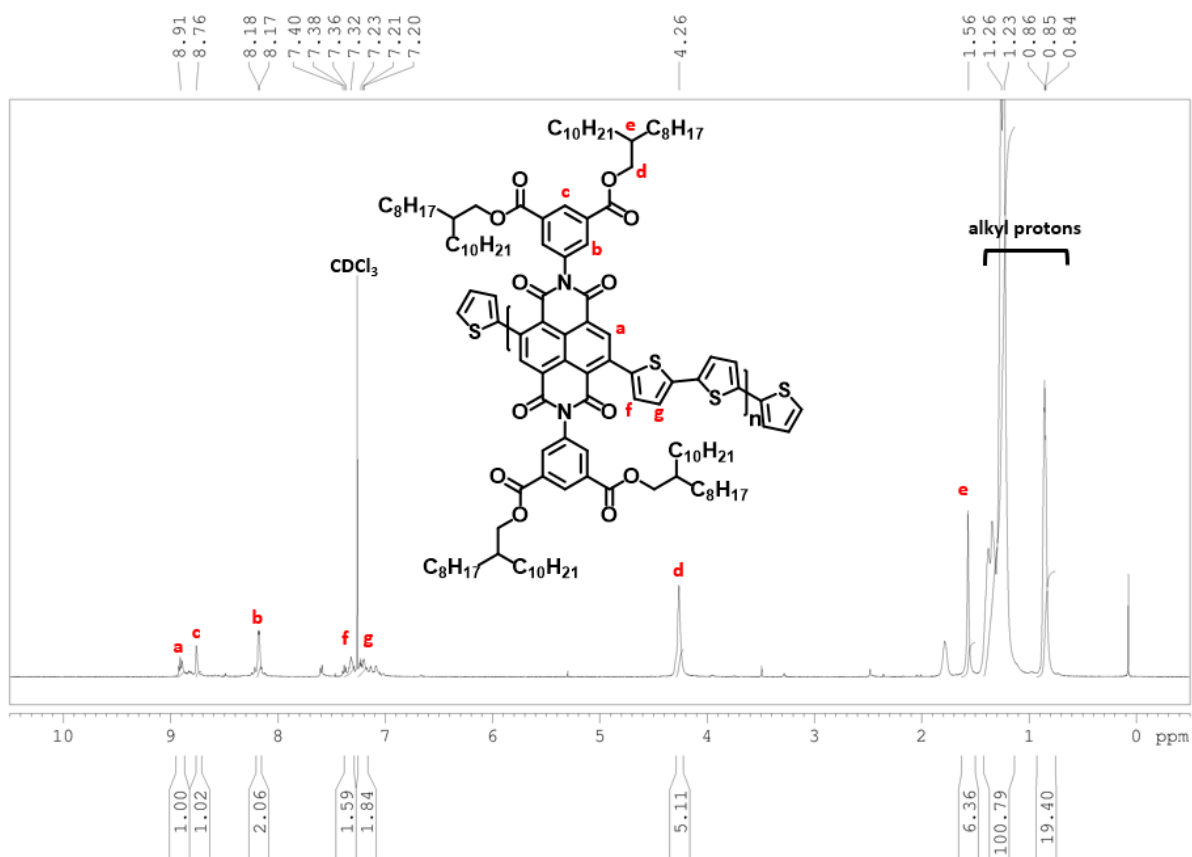

**Figure S14.**  $^1\text{H}$  NMR spectrum of **P3** in  $\text{CDCl}_3$ .

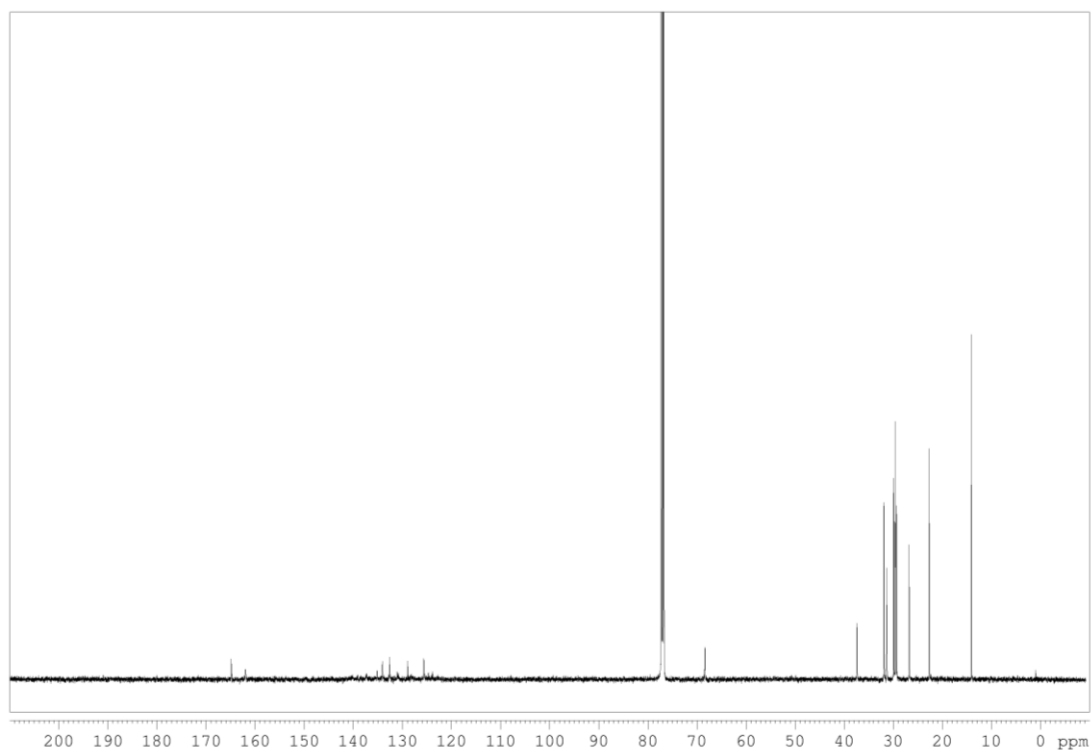

**Figure S15.**  $^{13}\text{C}$  NMR spectrum of **P3** in  $\text{CDCl}_3$ .

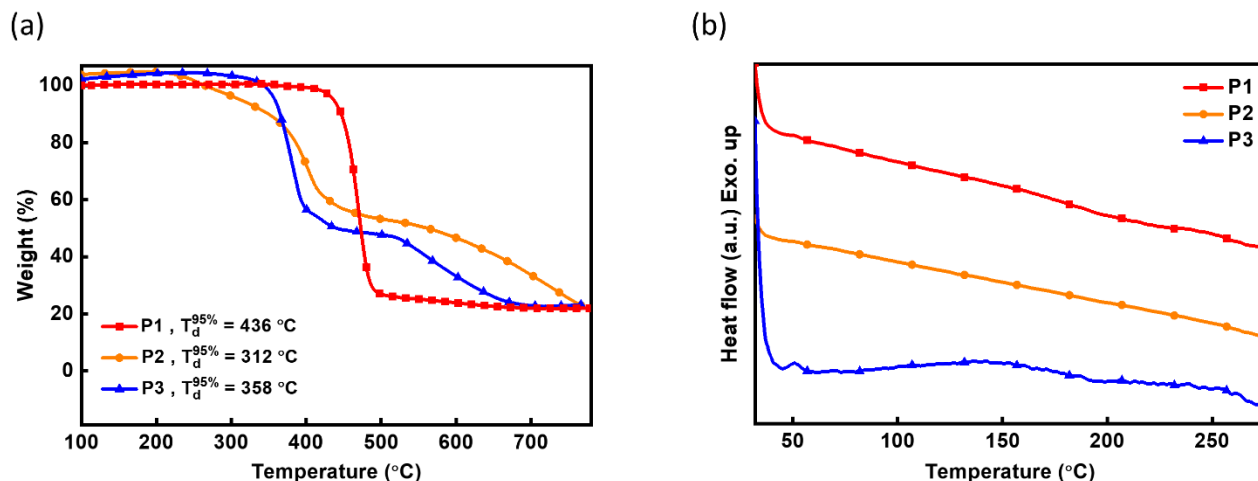

**Figure S16.** Thermal properties of the polymers studied: (a) TGA and (b) DSC profiles at a ramping rate of  $10\text{ }^{\circ}\text{C min}^{-1}$ .

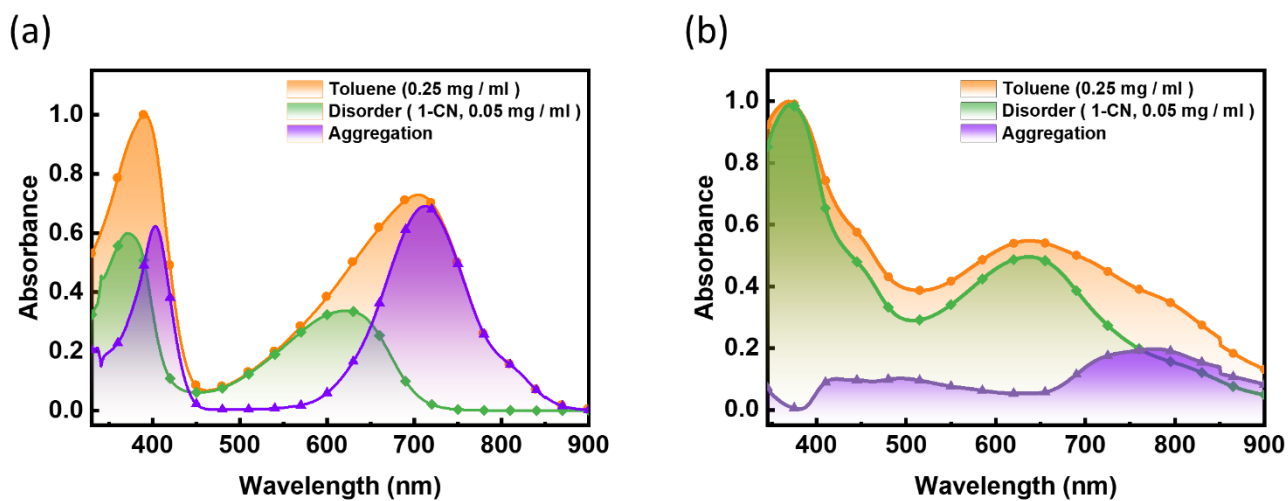

**Figure S17.** Aggregation and disorder fractions in the UV–Vis absorption spectra of polymers (a) **P1** and (b) **P2**. Note that the polymer solutions in toluene were prepared at a concentration of  $0.25\text{ mg mL}^{-1}$ , and the disordered polymer solutions were prepared in 1-chloronaphthalene (1-CN) at a concentration of  $0.05\text{ mg mL}^{-1}$ .

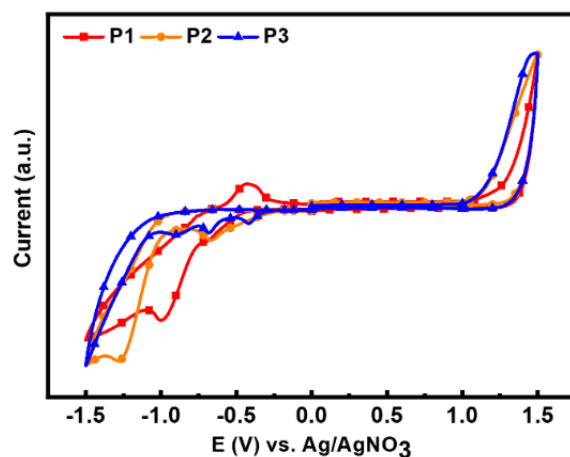

**Figure S18.** CV profiles of the polymer films coated on an ITO glass. The measurement was conducted at a scanning rate of  $0.1 \text{ V s}^{-1}$ .

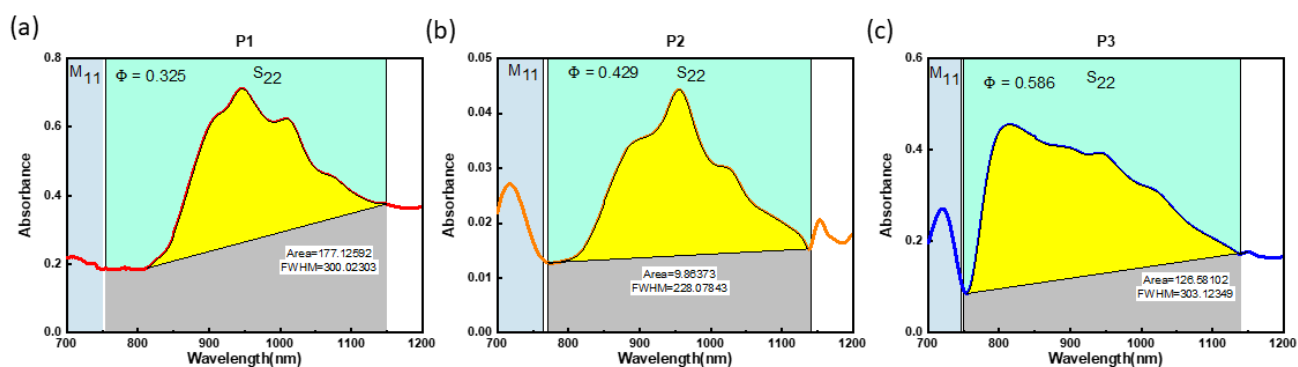

**Figure S19.** UV-Vis absorption spectra of the *sc*-SWNTs sorting solutions for calculating its purity: (a) **P1**/*sc*-SWNT, (b) **P2**/*sc*-SWNTs, and (c) **P3**/*sc*-SWNTs. The absorbances of NDI-based CPs were deconvoluted and subtracted from the absorption spectra of CP/*sc*-SWNT solutions.

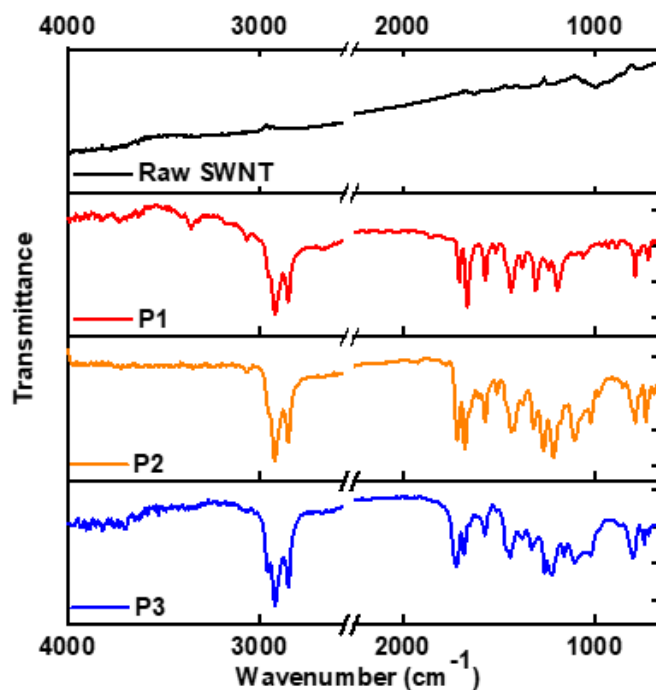

**Figure S20.** FT-IR spectra of the raw SWNT, and pure polymer powder of **P1**, **P2**, and **P3**.

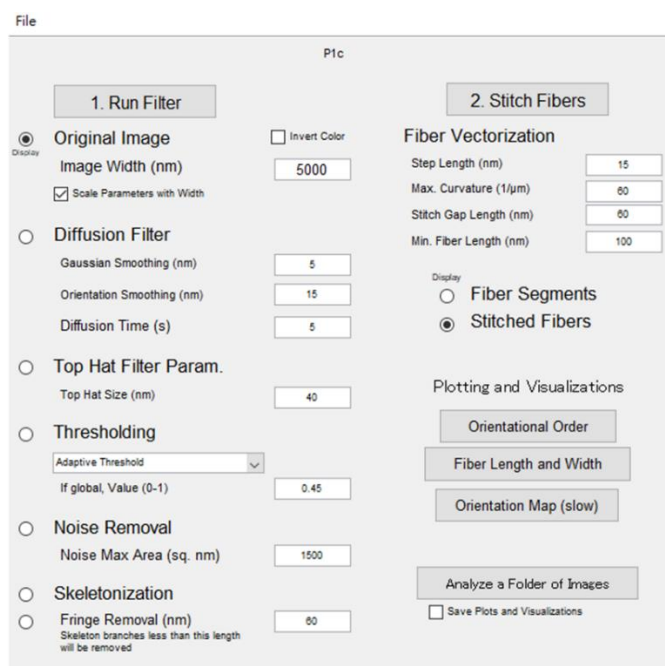

**Figure S21.** SWNT morphology fitting parameters in GTFiber software for extracting the lengths of *sc*-SWNTs in AFM topography. The program was developed by Persson *et al.* and reported in *Chem. Mater.* **2017**, *29*, 3-14.

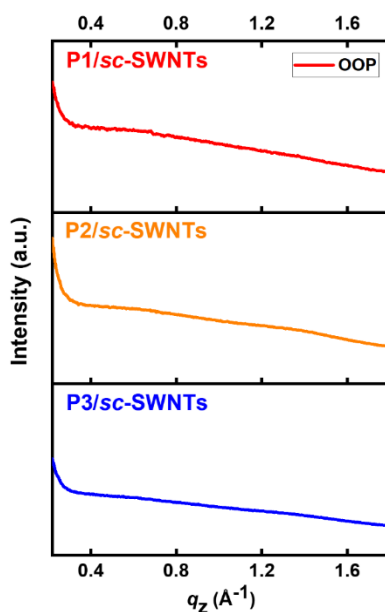

**Figure S22.** 1D GIXD profiles of CP/*sc*-SWNT films extracted along the OOP direction: the lamellar stacking is inhibited with the existence of *sc*-SWNTs.

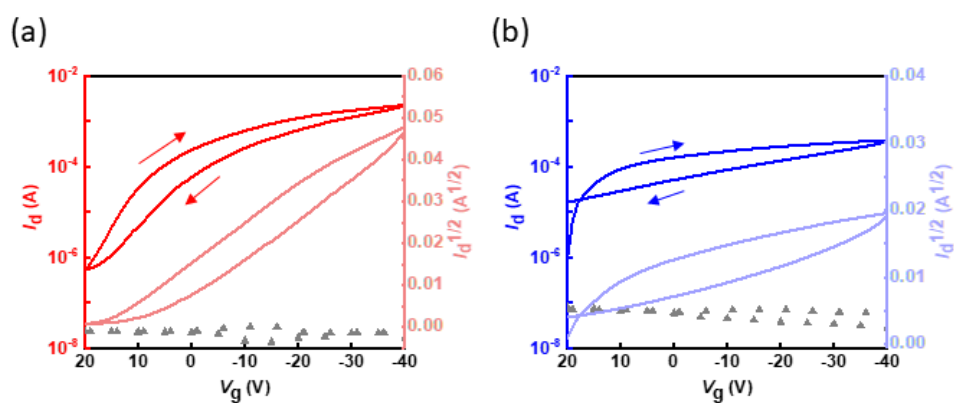

**Figure S23.** Transfer characteristics curves with  $V_d = -100$  V for CP/*sc*-SWNT devices of (a) **P1**/*sc*-SWNTs and (b) **P3**/*sc*-SWNTs. Note that gray scattered dots represent the gate current measured, and the curves were swept from 20 to  $-40$  V for *p*-type operation.



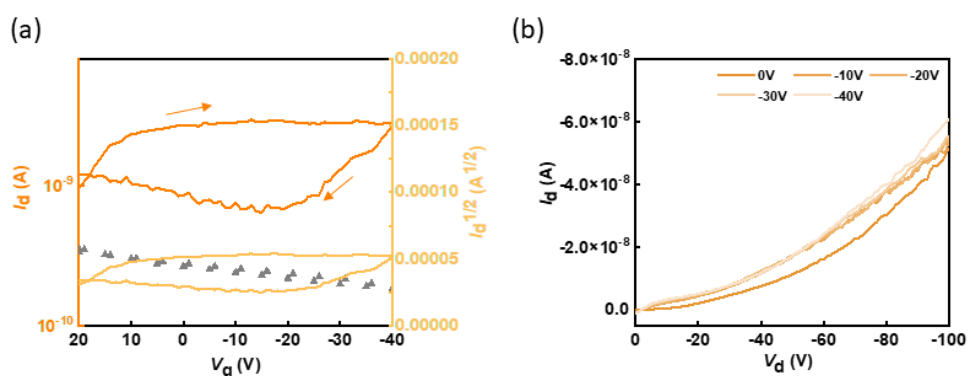

**Figure S24.** (a) Transfer curve with  $V_d = -10$  V and (b) output curve of **P2**/*sc*-SWNTs device. Note that the device's drain current is low due to the low yield of *sc*-SWNTs sorted by **P2**.

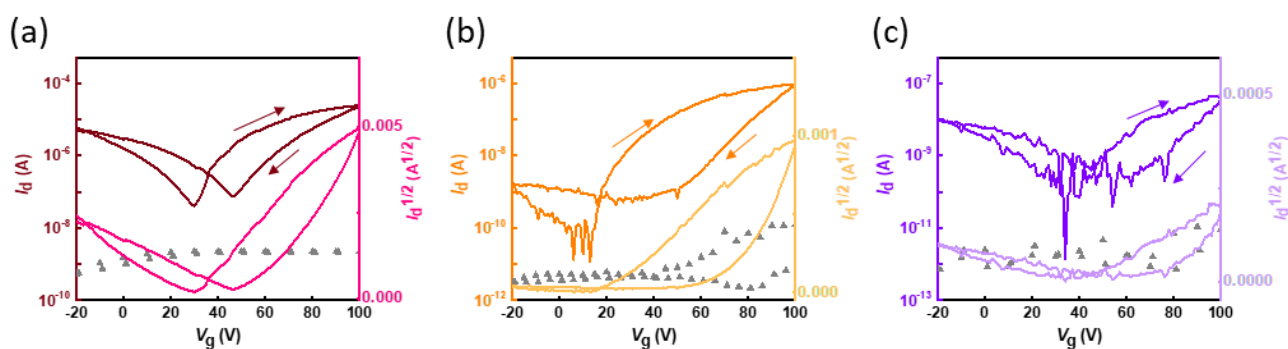

**Figure S25.** FET transfer characteristics of the *n*-type CP films of (a) **P1**, (b) **P2**, and (c) **P3**. Note that the gray scattered dots represent the gate currents measured, and the curves were swept from  $-20$  to  $100$  V for *n*-type operation.

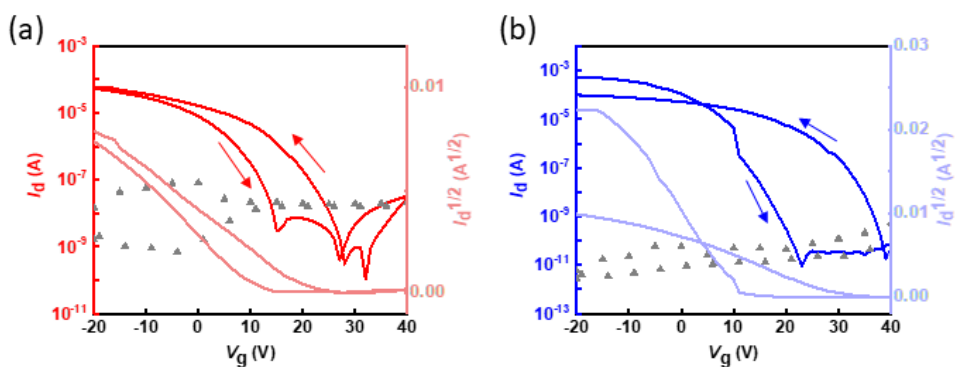

**Figure S26.** *N*-type transfer characteristic curves of the CP/*sc*-SWNTs device of (a) **P1**/*sc*-SWNTs and (b) **P3**/*sc*-SWNTs. Note that the curves were swept from  $-20$  to  $40$  V at  $V_d = 10$  V.

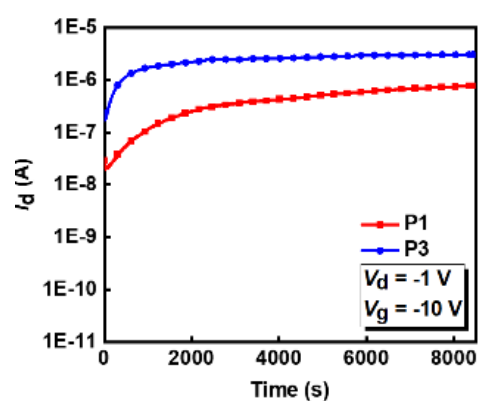

**Figure S27.** Bias stability test of CP/*sc*-SWNT based devices by applying  $V_g = -10$  V at  $V_d = -1$  V.

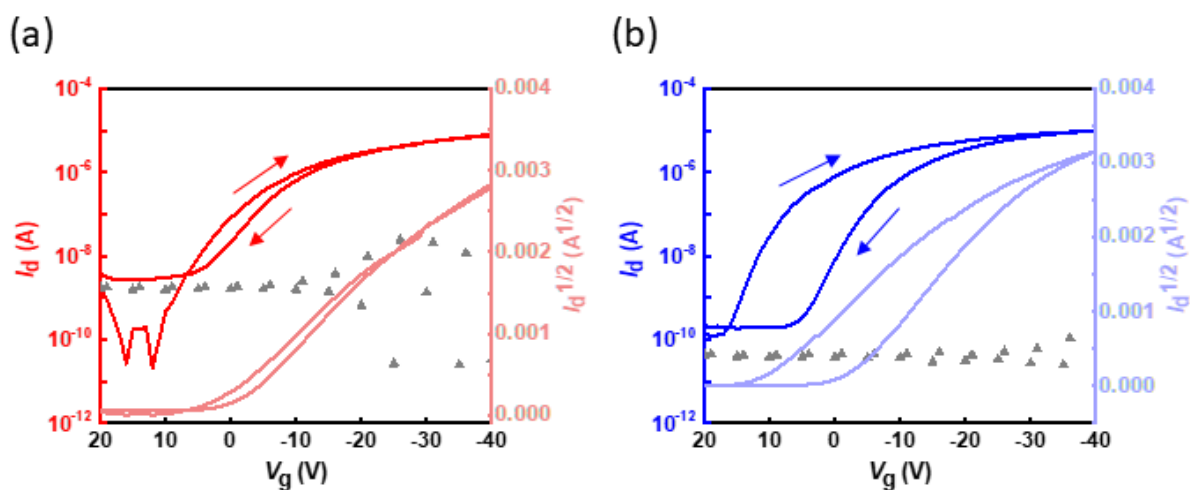

**Figure S28.** Transfer characteristics curves with  $V_d = -1$  V for the CP/*sc*-SWNT devices of (a) **P1**/*sc*-SWNTs and (b) **P3**/*sc*-SWNTs. Note that gray scattered dots represent the gate current measured, and the curves were swept from 20 to  $-40$  V for *p*-type operation.
